# Supplementary material for: Exploring Clinical Correlates of Metacognition in Bipolar Disorders Using Moderation Analyses: The Role of Antipsychotics
Source: Preprints.org preprint supplement (doi:10.20944/preprints202108.0320.v1), 2021-08-16
Supplement: Supplementary file 1 [file supplementary]

**Supplementary Figure 2. Distribution of objective cognition according to the level of cognitive complaints in the observed dataset**

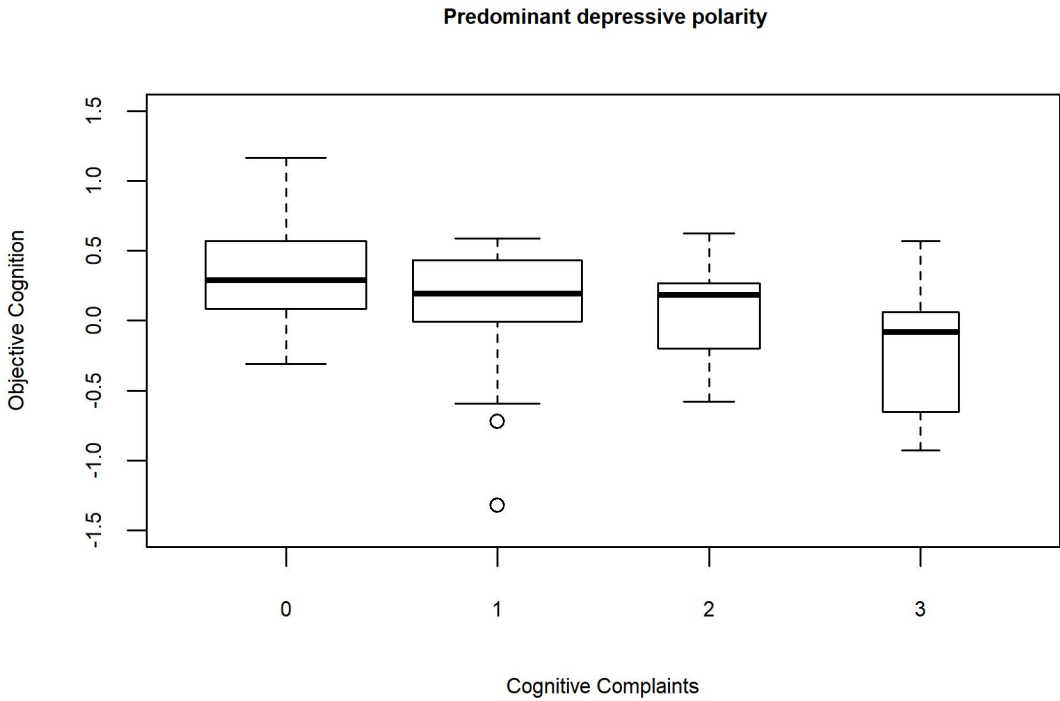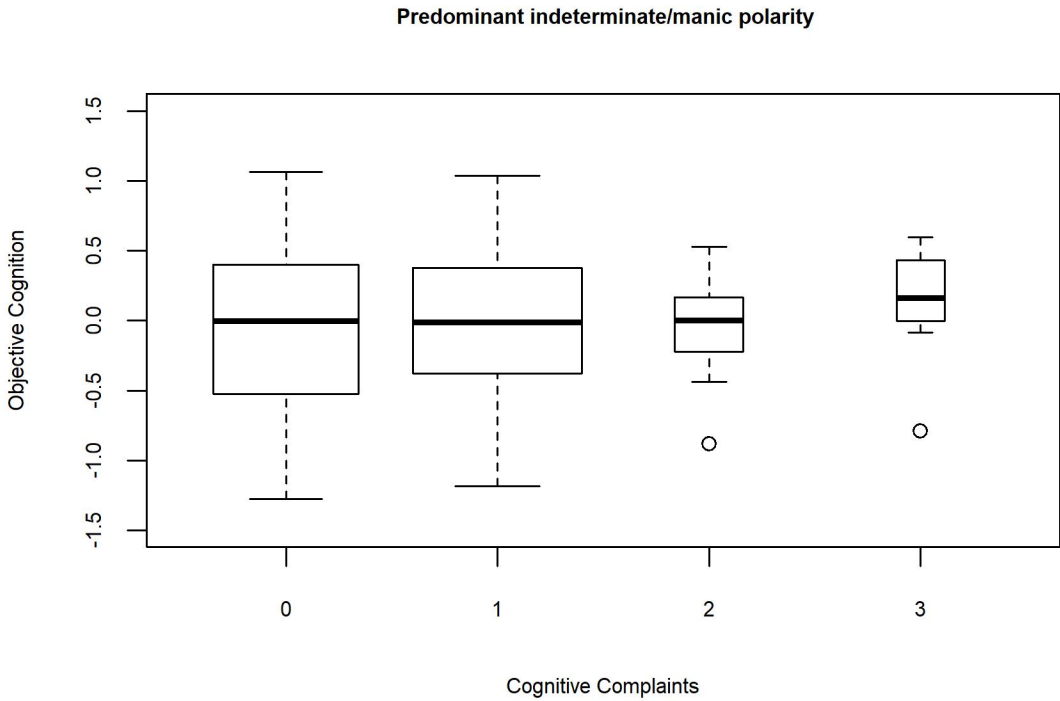

The width of the box is proportional to the sample size in each level of cognitive complaints
