# Supplementary material for: Exploring Clinical Correlates of Metacognition in Bipolar Disorders Using Moderation Analyses: The Role of Antipsychotics
Source: Preprints.org preprint supplement (doi:10.20944/preprints202108.0320.v1), 2021-08-16
Supplement: Supplementary file 2 [file Supplementary Table A3.docx]

**Supplementary Table A3.** Results for the trivariable ordinal logistic regressions with cognitive complaints as the dependent variable and objective cognition, several successive clinical moderators, and the interaction between objective cognition and the clinical moderators as the independent variables. This table reports only the main effect of objective cognitive performance (the main effect of the clinical moderators and the interaction between objective cognition and the clinical moderators are reported in Supplementary Table A1 & Tale 3 respectively).

| **Variable** | **B (SD)** | **Statistic** | **p** | **λ** | **fmi** |
| --- | --- | --- | --- | --- | --- |
| Age | 0.37 (0.84) | t(255.7)=0.4 | 0.661 | 0.051 | 0.058 |
| Sex | -0.37 (0.33) | t(254.9)=-1.1 | 0.255 | 0.053 | 0.06 |
| Educational level | -0.74 (1.36) | t(240.3)=-0.5 | 0.589 | 0.086 | 0.094 |
| Diagnosis (Type 2/NOS vs Type 1) | -0.3 (0.41) | t(239.4)=-0.7 | 0.46 | 0.088 | 0.096 |
| Total number of mood episodes | -0.14 (0.43) | t(108.9)=-0.3 | 0.735 | 0.393 | 0.404 |
| **Predominant Polarity** | **-1.16 (0.46)** | **t(155.8)=-2.5** | **0.012** | **0.265** | **0.274** |
| Age at onset | -0.27 (0.71) | t(253.8)=-0.4 | 0.702 | 0.055 | 0.063 |
| History of psychosis | -0.47 (0.27) | t(227.5)=-1.7 | 0.086 | 0.114 | 0.121 |
| Rapid cycling | -0.4 (0.24) | t(257.3)=-1.7 | 0.095 | 0.047 | 0.054 |
| CGI Severity | -2.46 (1.42) | t(241.2)=-1.7 | 0.086 | 0.084 | 0.092 |
| MADRS | -0.32 (0.35) | t(254)=-0.9 | 0.356 | 0.055 | 0.062 |
| YMRS | -0.4 (0.29) | t(244.4)=-1.4 | 0.168 | 0.077 | 0.085 |
| Antidepressant | -0.3 (0.26) | t(261.7)=-1.2 | 0.237 | 0.035 | 0.042 |
| Anticonvulsant | -0.39 (0.25) | t(261.4)=-1.6 | 0.121 | 0.036 | 0.043 |
| Lithium Carbonate | -0.24 (0.25) | t(252)=-1 | 0.337 | 0.06 | 0.067 |
| **Antipsychotic** | **-0.74 (0.26)** | **t(257.8)=-2.9** | **0.004** | **0.045** | **0.053** |
| Anxiolytic | -0.18 (0.26) | t(250.9)=-0.7 | 0.489 | 0.062 | 0.07 |
| Any lifetime substance use disorder | -0.44 (0.27) | t(251.5)=-1.6 | 0.103 | 0.061 | 0.068 |
| BIS | -2.01 (1.6) | t(248.4)=-1.3 | 0.21 | 0.068 | 0.076 |
| CTQ | -0.08 (0.77) | t(235.5)=-0.1 | 0.921 | 0.097 | 0.104 |
| **FAST** | **-0.82 (0.41)** | **t(259.7)=-2** | **0.044** | **0.04** | **0.048** |
| MARS | -1.05 (0.73) | t(245.6)=-1.4 | 0.152 | 0.075 | 0.082 |
| Type of WAIS | -0.32 (0.66) | t(184.5)=-0.5 | 0.631 | 0.202 | 0.21 |

B: unstandardized coefficient; fmi: fraction of missing information, NOS: not otherwise specified; CGI: Clinical Global Impression scale, MADRS: Montgomery Åsberg Depression Rating Scale, YMRS: Young Mania Rating Scale, BIS: Barratt Impulsiveness Scale, CTQ: Childhood Trauma Questionnaire, FAST: Functioning Assessment Short Test, MARS: Medication Adherence Rating Scale, WAIS: Wechsler Adult Intelligence Scale
