# Supplementary figures and images for: Exploring Clinical Correlates of Metacognition in Bipolar Disorders Using Moderation Analyses: The Role of Antipsychotics
Source: Preprints.org preprint supplement (doi:10.20944/preprints202108.0320.v1), 2021-08-16

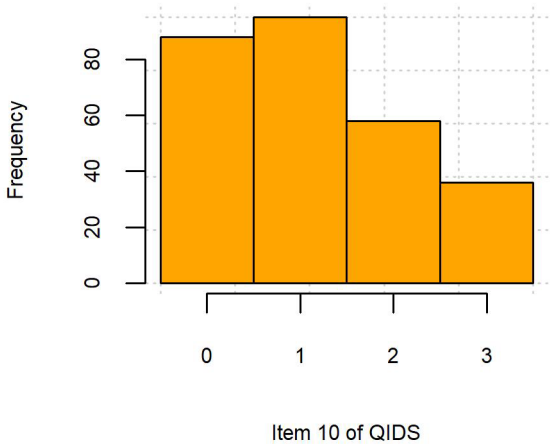

Supplement: Supplementary file 2 [file supplementary]
